# Supplementary material for: Thermoplastic polyurethane elastomers from bio-based poly(δ-decalactone) diols
Source: Royal Society of Chemistry journal article supplement (doi:10.1039/c3py01120h), 2013-11-01
Supplement: c3py01120h.pdf [file c3py01120h.pdf]

## Supporting information

### **Thermoplastic polyurethane elastomers from bio-based poly( $\delta$ -decalactone) diols**

Donglin Tang,<sup>1</sup> Christopher W. Macosko,<sup>2\*</sup> Marc A. Hillmyer<sup>1\*</sup>

**Figure S1.** <sup>1</sup>H-NMR spectra of the monomer dDL (top), the PdDL before (middle) and after (bottom) purification.

**Figure S2.** DSC traces of the PdDLs (second heating cycles; heating rate = 20 °C/min).

**Figure S3.** SEC traces of the PdDL-based TPUs.

**Figure S4.** Infrared spectra of the TPUs.

**Figure S5.** 50 Percent, 5 cycle hysteresis curves of the PdDL-based TPUs (crosshead speed: 60 mm/min).

**Table S1** Some supplemental information of the TPUs derived from DMA data.

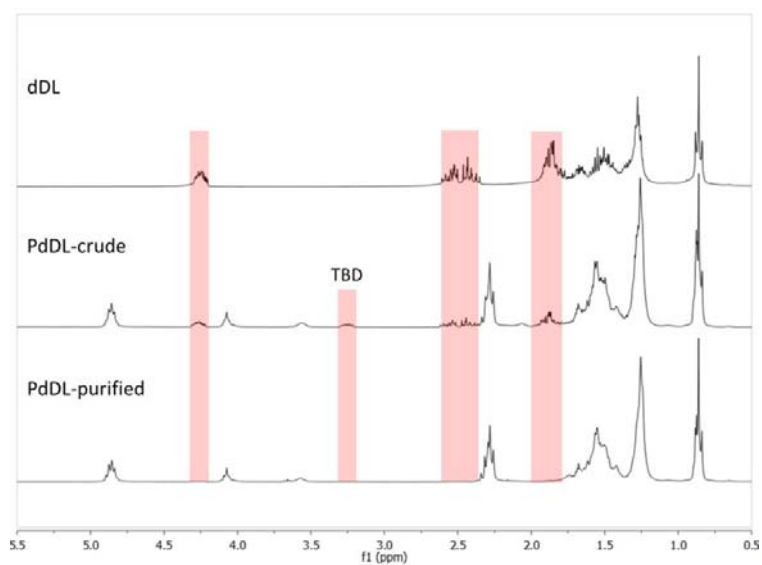

**Figure S1.** <sup>1</sup>H-NMR spectra of the monomer dDL (top), the PdDL before (middle) and after (bottom) purification.

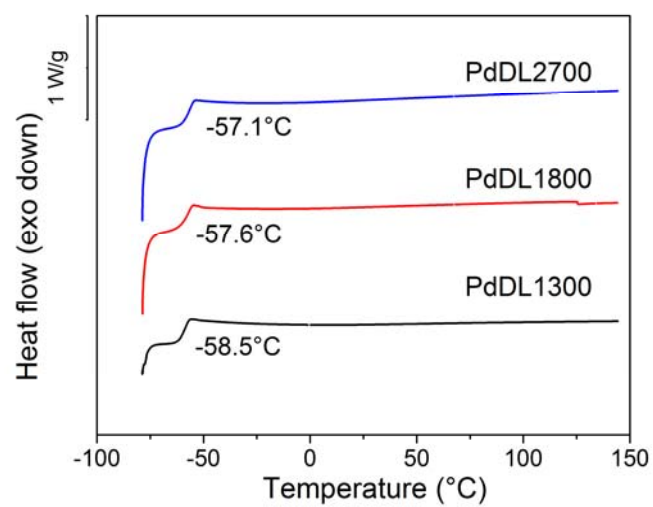

**Figure S2.** DSC traces of the PdDLs (second heating cycles; heating rate = 20 °C/min).

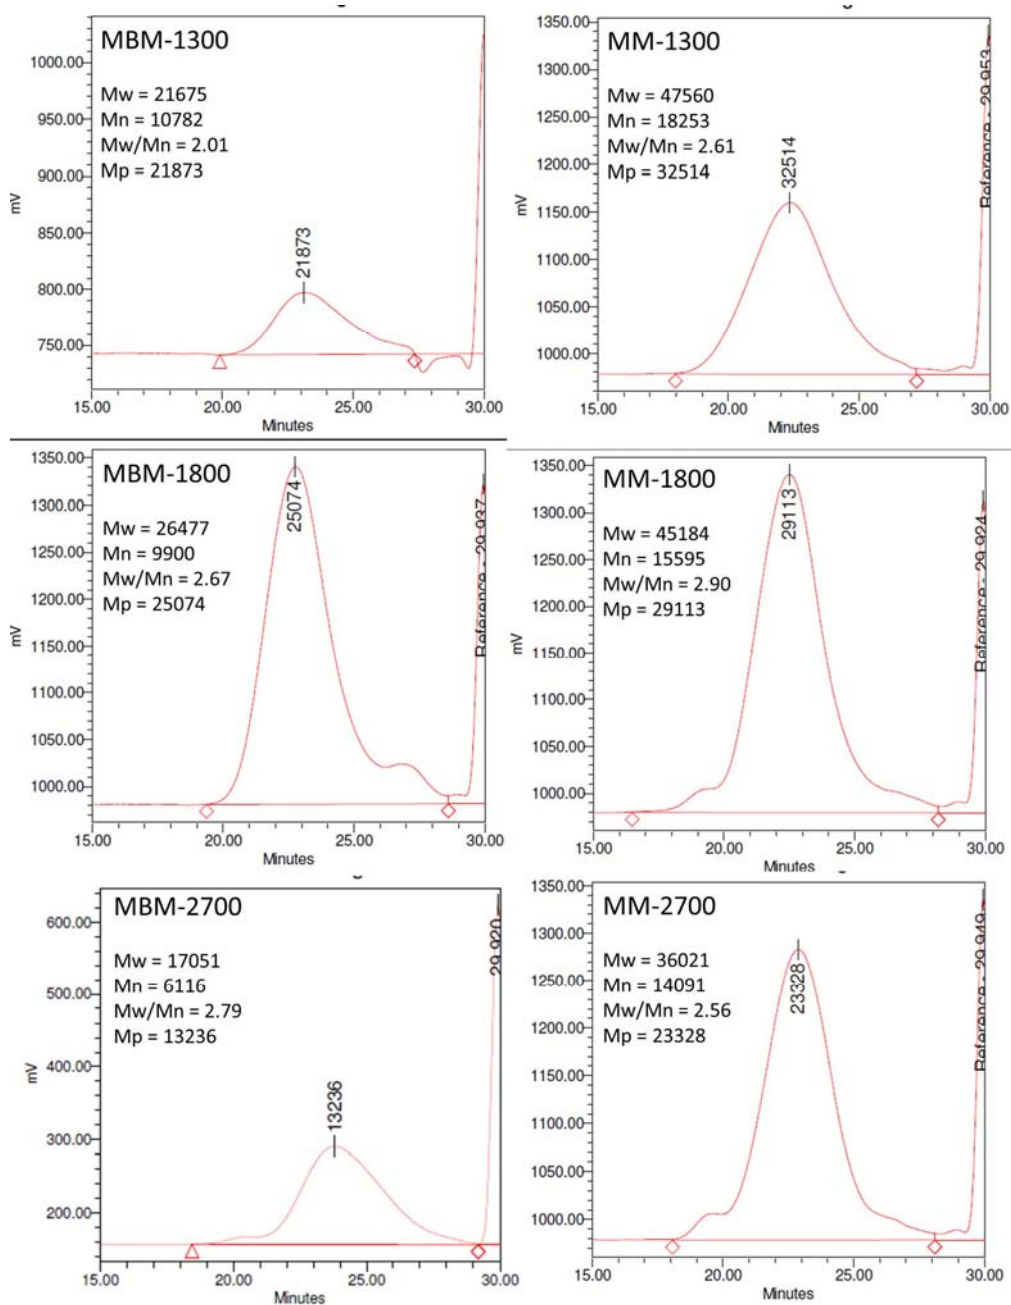

Figure S3. SEC traces of the PDDL-based TPUs.

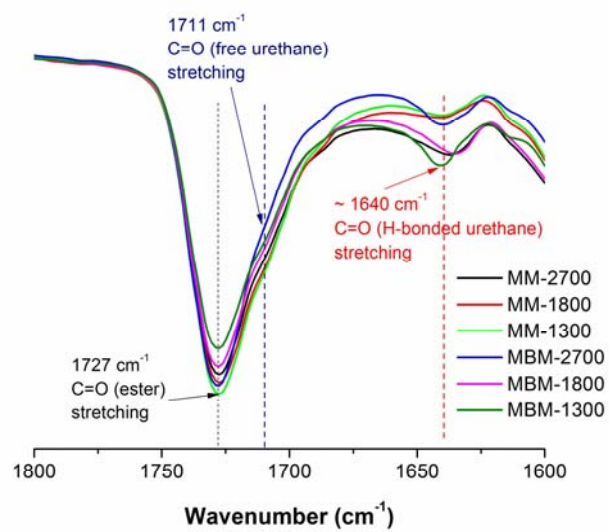

**Figure S4.** Infrared spectra of the TPUs.

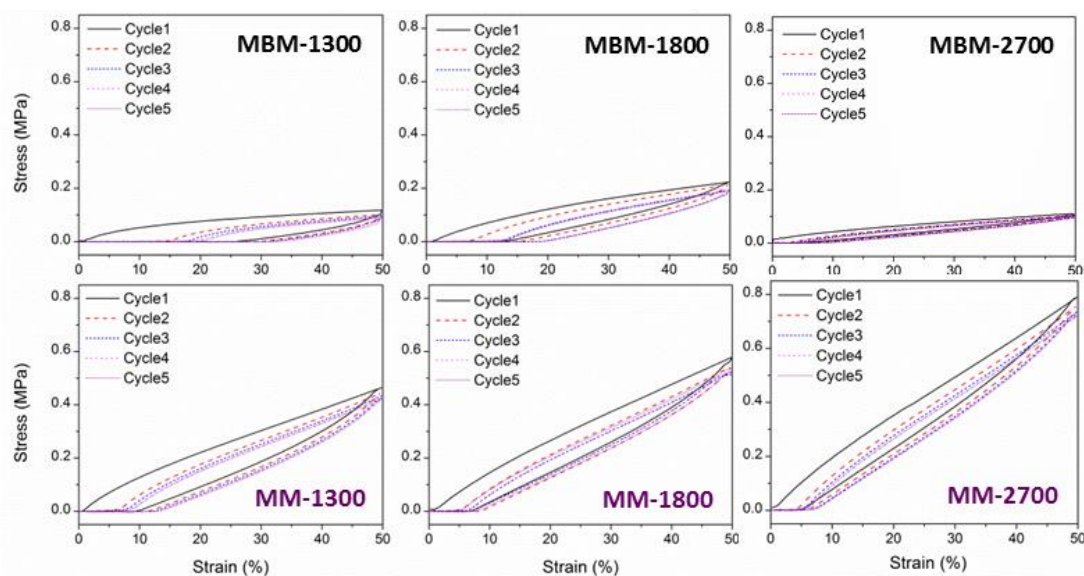

**Figure S5.** 50 Percent, 5 cycle hysteresis curves of the PDDL-based TPUs (crosshead speed: 60 mm/min).

**Table S1** Some supplemental information of the TPUs derived from DMA data.

|          | DMA                                                                                               | Tensile test                                    |                                        |
|----------|---------------------------------------------------------------------------------------------------|-------------------------------------------------|----------------------------------------|
|          | $\Delta(\log E')/\Delta T$ <sup>75-125 °C</sup><br>$10^{-3} \cdot \text{MPa} \cdot \text{K}^{-1}$ | <b>Tan <math>\delta</math></b> <sup>25 °C</sup> | <b>Hysteresis</b> <sup>1st cycle</sup> |
| MBM-1300 | 7.6                                                                                               | 0.61                                            | 0.75                                   |
| MBM-1800 | 1.8                                                                                               | 0.25                                            | 0.46                                   |
| MBM-2700 | 8.2                                                                                               | 0.35                                            | 0.36                                   |
| MM-1300  | 3.3                                                                                               | 0.36                                            | 0.37                                   |
| MM-1800  | 2.7                                                                                               | 0.18                                            | 0.29                                   |
| MM-2700  | 2.8                                                                                               | 0.16                                            | 0.22                                   |
